# Supplementary material for: Sperm membrane proteins DCST1 and DCST2 are required for sperm-egg interaction in mice and fish
Source: PubMed Central journal article supplement (PMC8989947; doi:10.1038/s42003-022-03289-w), 2022-04-07
Supplement: 42003_2022_3289_MOESM2_ESM.pdf [file 42003_2022_3289_MOESM2_ESM.pdf]

## 1 **Supplementary information**

### 2 **Phylogenetic tree of the DC-STAMP-like containing proteins and analysis of** 3 **DCST1/2 protein conformation.**

4 Sequences were collected in an HMM search using the PFAM DC-STAMP model against  
5 NCBI-nr protein or UniProt reference proteomes databases applying highly significant E-  
6 value thresholds ( $<1e-10$ ), selected for a wide taxonomic range, and aligned with mafft (-  
7 linsi, v7.427)<sup>1-3</sup>. A region conserved within DCST1, DCST2, DCSTAMP and OCSTAMP  
8 orthologues (covering Homo sapiens DCST1 46-599) was extracted with Jalview<sup>4</sup>. A  
9 maximum-likelihood phylogenetic tree was reconstructed with IQ-TREE version 2.1.3  
10 using the "Q.plant+I+G4" model selected by ModelFinder and branch support obtained  
11 with the ultrafast bootstrap method v2<sup>5-7</sup>. The visualization was done with iTOL v6<sup>8</sup>.  
12 Branches supported by ultrafast bootstrap values ( $\geq 95\%$ ) were marked with a blue dot.  
13 Sequence accessions were added next to the species names.

14 The alignment of mouse and zebrafish DCST1 and DCST2 amino acid sequences was  
15 performed with Clustal Omega (<https://www.ebi.ac.uk/Tools/msa/clustalo/>) and  
16 visualized with JalView (<https://www.jalview.org/>)<sup>4</sup>. The DC-STAMP-like protein  
17 domain prediction was derived from pfam protein domains (<http://pfam.xfam.org/>).  
18 Transmembrane helices were predicted with TMHMM  
19 (<http://www.cbs.dtu.dk/services/TMHMM/>) and Phobius (<https://phobius.sbc.su.se/>)<sup>9,10</sup>.

### 21 **Generation of *Dcst1* and *Dcst2* mutant mice.**

22 *Dcst1* and *Dcst2* mutant mice were generated using 4 guide RNAs (gRNAs) (**Table S2**)  
23 as described previously<sup>11-13</sup>. Genotyping PCR was conducted with primer sets (**Table S2**)  
24 and KOD-Fx neo. The PCR condition was 94 °C for 3 minutes, denaturing at 94°C for 30  
25 seconds, annealing at 55°C (for *Dcst2* indel mutants) or 65°C (for *Dcst1* indel and *Dcst2*  
26 deletion mutants) for 30 seconds, and elongation 72°C for 30 seconds for 35 or 40 cycles  
27 in total, followed by 72°C for 2 minutes.

### 29 **Generation of Tg mice.**

30 Sequences of *Dcst1* cDNA-3xHA tag and *Dcst2* cDNA-3xHA with a rabbit poly A signal  
31 were inserted under mouse *Clgn* promoter. The linearized DNA was injected into the  
32 pronucleus of zygotes, and the injected eggs were transferred into the ampulla of  
33 pseudopregnant females. Genotyping PCR was conducted with primer sets (**Table S3**)  
34 and KOD-Fx neo. The PCR condition was 94°C for 3 minutes, denaturing at 94°C for 30  
35 seconds, annealing at 65°C for 30 seconds, and elongation 72°C for 1 minute (for *Dcst1*-  
36 3xHA), and 2 minutes (for *Dcst2*-3xHA) for 35 cycles in total, followed by 72°C for 2

37 minutes.

38

### 39 **Quantitative PCR (qPCR) to analyze *Dcst1* and *Dcst2* expression levels**

40 The synthesized cDNA (5 ng), primer sets (**Table S4**), and THUNDERBIRD Next SYBR  
41 qPCR Mix (TOYOBO) were used for qPCR. The condition for qPCR was 95°C for 30  
42 seconds, denaturing at 95°C for 5 seconds, annealing at 65°C for 10 seconds for 40 cycles  
43 in total. For melting curve, the samples was treated at 95°C for 15 seconds, followed by  
44 increasing the temperature by 0.3°C from 60°C. *Actb* was used as a reference gene, and  
45 the relative difference in the expression level was calculated by the  $\Delta\Delta C_t$  method.

46

### 47 **Morphology and histological analysis of a mouse testis.**

48 The testicular weight and body weight of *Dcst1<sup>dl/wt</sup>*, *Dcst1<sup>dl/dl</sup>*, *Dcst2<sup>d25/wt</sup>*, and *Dcst2<sup>d25/25</sup>*  
49 males (8-24 weeks old) were measured. The testis was fixed with Bouin's fluid  
50 (Polysciences) at 4°C overnight. Fixed samples were dehydrated by increasing the ethanol  
51 concentration, and then embedded with paraffin. Paraffin sections (5  $\mu$ m) were stained  
52 with 1% periodic acid solution (Wako) for 10 minutes. Then, these samples were  
53 counterstained with Mayer hematoxylin solution for 3 to 5 minutes, dehydrated in  
54 increasing ethanol concentrations, and finally mounted in Entellan new (Merck).

55

### 56 **CRISPR/Cas9-mediated zebrafish mutant generation.**

57 Homozygous mutants for *dcst1*, *dcst2*, and *dcst1/2* were generated in zebrafish using  
58 CRISPR/Cas9-mediated mutagenesis through the use of single gRNAs (sgRNAs)  
59 generated as previously described<sup>14</sup>. SgRNAs targeting exons 2 and 3 for *dcst1* or exon 4  
60 for *dcst2* (**Table S5**) were co-injected with Cas9 protein into one-cell TLAB embryos to  
61 generate the single knock-out mutants (**Figure S12B**). *Dcst1/2<sup>-/-</sup>* zebrafish were generated  
62 in the same manner, but by injecting sgRNAs targeting exons 2 and 3 for *dcst1* in  
63 conjunction with those targeting exon 4 for *dcst2* into a *dcst1* mutant background (149 bp  
64 deletion, 14 bp insertion) to increase the chances of mutagenesis for both genes on the  
65 same allele. For all mutants, injected embryos were grown to adulthood and out-crossed  
66 to *wt* TLAB zebrafish; the offspring were then screened by PCR (**Table S5**) for  
67 heterozygous mutations in *dcst1*, *dcst2*, or both loci to identify founders. Siblings of fish  
68 found to carry mutations in the *dcst1* or *dcst2* locus were grown to adulthood and in-  
69 crossed to generate homozygous mutant fish. Amplicon sequencing of adult fin-clips  
70 revealed the different mutations as a 2-bp substitution combined with a 50-bp insertion  
71 and 1-bp substitution in exon 2, and 4-bp deletion in exon 3 of *dcst1<sup>-/-</sup>*; a 7-bp deletion in  
72 exon-4 for *dcst2<sup>-/-</sup>*; and a 155-bp deletion in *dcst1* exon 3 combined with a 4-bp insertion

73 followed by a 64-bp insertion in *dcst2* exon 4 in case of the double mutant *dcst1/2<sup>-/-</sup>*.  
74 Genotyping of *dcst1<sup>-/-</sup>*, *dcst2<sup>-/-</sup>*, and *dcst1/2<sup>-/-</sup>* mutant fish was performed using PCR  
75 (Table S5). Detection of mutations was performed using standard agarose gel  
76 electrophoresis (wt amplicon for *dcst1*: 311 bp, wt amplicon for *dcst2*: 394 bp, *dcst1<sup>-/-</sup>*  
77 amplicon: 358 bp; *dcst2<sup>-/-</sup>* amplicon: 387 bp; amplicon sizes in the *dcst1/2<sup>-/-</sup>* double  
78 mutant: *dcst1<sup>-/-</sup>* amplicon: 156 bp; *dcst2<sup>-/-</sup>* amplicon 467 bp). To confirm the presence of  
79 a truncated mRNA product for both mutants, cDNA was generated using the iSCRIPT  
80 cDNA Synthesis Kit (BioRad) from RNA isolated from mutant testis tissue. Sanger  
81 sequencing using primers within the open reading frame for both *dcst1* and *dcst2* was  
82 performed using the primers listed below (Table S5). Confirming that the mutations lead  
83 to a truncated mRNA product, the *dcst1<sup>-/-</sup>* cDNA encoded only 15 amino acids with a  
84 premature termination codon, compared to 676 amino acids for wt, the *dcst2<sup>-/-</sup>* cDNA  
85 encoded 183 amino acids (709 amino acids in wt), and the *dcst1/2<sup>-/-</sup>* cDNA encoded 25  
86 amino acids for *dcst1* and 170 amino acids for *dcst2* (Figure S12C). The recovered  
87 mutant alleles were registered with ZFIN as vbc14, vbc15, and vbc16 respectively.

88

#### 89 **Generation of Dcst2 RING finger domain constructs.**

90 To clone the coding sequence of the Dcst2 RING finger domain, RNA was isolated from  
91 adult testis using the standard TRIzol (Invitrogen) protocol followed by  
92 phenol/chloroform extraction. cDNA was synthesized using the iSCRIPT cDNA  
93 Synthesis Kit (BioRad) and served as template for the amplification of the sequence  
94 underlying Dcst2 (566-709) (Dcst2-RING\_F and Dcst2-RING\_R). The PCR product was  
95 introduced into BamHI/EcoRI-cut *pMTB-actb2:MCS-sfGFP* (a derivative of *pMTB-*  
96 *actb2:H2B-Cerulean*, a kind gift from Sean Megason) by Gibson assembly<sup>15</sup> to generate  
97 an in-frame fusion to sfGFP. The resulting ORF is flanked by a SP6 promoter and SV40  
98 3' UTR.

99

#### 100 **mRNA injection of zebrafish embryos.**

101 TLAB embryos were collected immediately after being laid and dechorionated with  
102 pronase (1 mg/ml). Dechorionated one-cell stage embryos were injected with 100 pg  
103 mRNA and cultured at 28°C in E3 medium (5 mM NaCl, 0.17 mM KCl, 0.33 mM CaCl<sub>2</sub>,  
104 0.33 mM MgSO<sub>4</sub>, 10<sup>-5</sup>% Methylene Blue). mRNA encoding Dcst2(566-709)-sfGFP was  
105 prepared by *in vitro* transcription using the mMESSAGING mMACHINE SP6 kit  
106 (Invitrogen) from a plasmid containing the SP6 promoter and SV40 3' UTR. Shield-stage  
107 (6 hpf) embryos were fixed with 3.7% formaldehyde at 4°C overnight.  
108 Immunofluorescence staining of embryos was performed as was done for zebrafish sperm

109 immunocytochemistry, but with goat anti-mouse IgG Alexa Fluor 594 as secondary  
110 antibody. The embryos were imaged in PBS in a watch glass with a stereomicroscope  
111 (Lumar, Zeiss) with the 0.8x Neo Lumar S objective and 5x zoom (40x magnification).

112

### 113 **Zebrafish adult tissue RNA-Seq.**

114 Adult zebrafish tissues (muscle, spleen, liver, intestine, heart, brain, fin, skin, testis) were  
115 dissected from adult *wt* (TLAB) zebrafish (three biological replicates for each sample).  
116 Total RNA was isolated using the standard TRIzol protocol and assessed for quality and  
117 quantity based on analysis on the Fragment Analyzer. PolyA+ RNA was selected with  
118 the poly(A) RNA Selection Kit (LEXOGEN), following the manufacturer's instructions.  
119 Stranded cDNA libraries were generated using NEBNext Ultra Directional RNA Library  
120 Prep Kit for Illumina (New England Biolabs) and indexed with NEBNext Multiplex  
121 Oligos for Illumina (Dual Index Primer Set I) (New England Biolabs). Library quality  
122 was checked on the Fragment Analyzer and sequenced on a Illumina Hiseq 2500 with the  
123 SR100 mode. RNA-seq reads were processed according to standard bioinformatic  
124 procedures. Reads were mapped to Ensembl 102 gene models (downloaded 2021.01.25)  
125 and the GRCz11 *Danio rerio* genome assembly, with Hisat2 v2.1.0<sup>16</sup> using the Ensembl  
126 transcriptome release 102. A custom file was generated by adding bouncer based on its  
127 position coordinates [exon = chr18:50975023-50975623 (+ strand); CDS =  
128 chr18:50975045-50975422 (+ strand)]. Quantification at the gene level (transcript per  
129 million (TPM)) was performed using Kallisto (v0.46.0)<sup>17</sup>. The RNA-seq data set was  
130 deposited to Gene Expression Omnibus (GEO) and is available under GEO acquisition  
131 number GSE171906. RNA-seq data of ovary and oocyte-stage samples have been  
132 published previously and are available under GEO acquisition numbers GSE111882  
133 (testis, ovary, mature oocytes)<sup>18</sup> and GSE147112 (oogenesis, mature oocytes)<sup>19</sup>.

134

135

136  
137  
138  
139  
140  
141  
142  
143  
144  
145  
146  
147  
148  
149  
150  
151  
152  
153  
154  
155  
156  
157  
158  
159  
160  
161  
162  
163  
164  
165  
166  
167  
168  
169  
170  
171

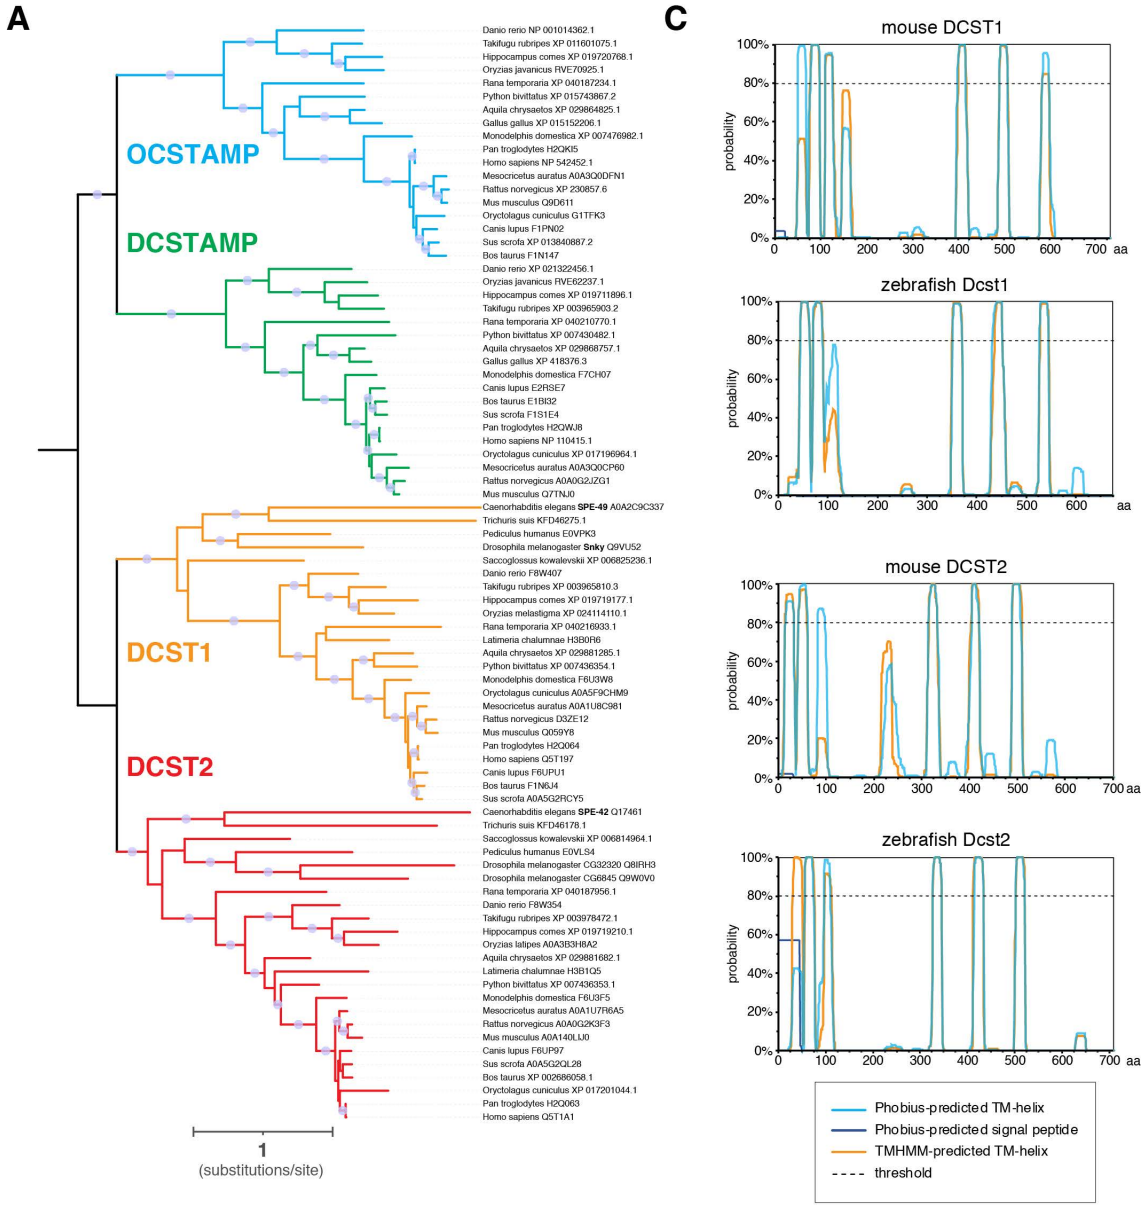

172 **Figure S1. Conservation of DCST1 and DCST2 across bilaterians and predicted**  
173 **protein structure.**

174 **A) Phylogenetic tree of the DC-STAMP-like domain containing proteins.** A  
175 maximum-likelihood phylogenetic tree revealed an early split between DCSTAMP  
176 (green) and OCSTAMP (blue) proteins on the one hand and DCST1 (orange) and DCST2  
177 (red) on the other hand. Common protein names for *C. elegans* SPE-42/SPE-49 and *D.*  
178 *melanogaster* Sneaky are included. The branch lengths represent the number of  
179 substitutions per site.

180 **B) Amino acid sequence alignment between mouse and zebrafish DCST1 and**  
181 **DCST2.** Letters with blue shading indicate the percentage of sequence identity (dark blue:  
182 100% identity). The DC-STAMP-like protein domain is highlighted in an orange box.

183 **C) Predicted transmembrane helices for mouse and zebrafish DCST1 and DCST2.**  
184 Plots show predicted probabilities for transmembrane helices [TMHMM (orange) and  
185 Phobius (blue)] in mouse and zebrafish DCST1 and DCST2.

186

187

188

189

190

191

192

193

194

195

196

197

198

199

200

201

202

203

204

205

206

207

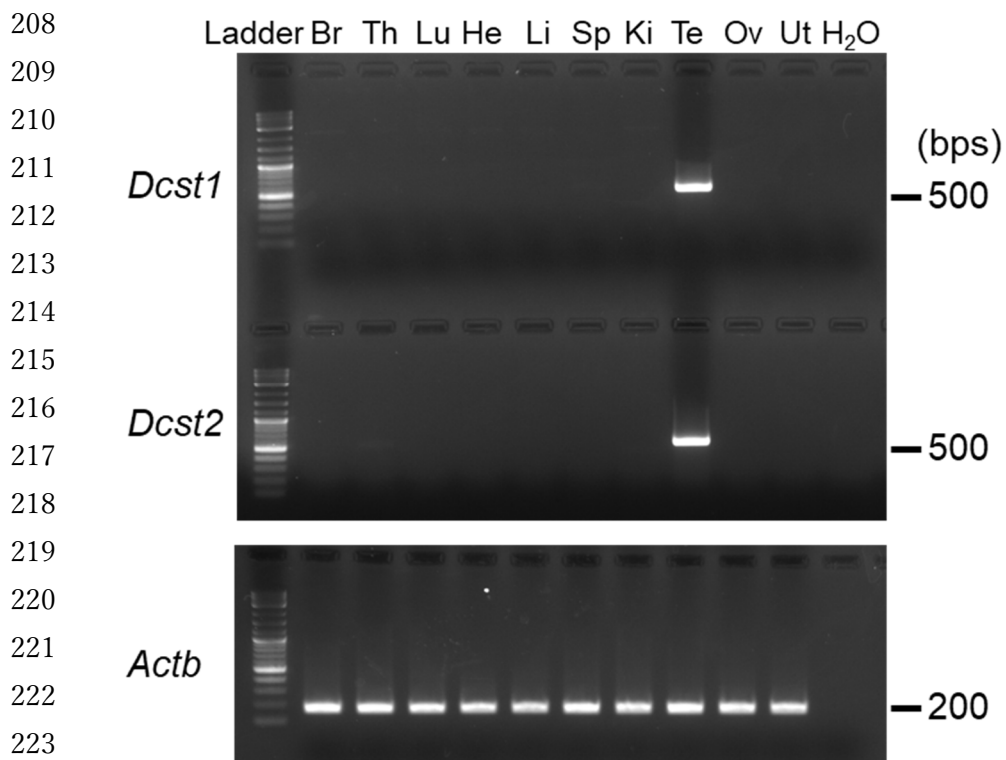

227 **Figure S2. Multi-tissue gene expression analysis.** *Dcst1* and *Dcst2* are abundantly  
 228 expressed in the mouse testis. Beta actin (*Actb*) was used as the loading control. The  
 229 uncropped and unedited images in Figure 1A were shown. Br, brain; Th, thymus; Lu,  
 230 lung; He, heart; Li, liver; Sp, spleen; Ki, kidney; Te, testis; Ov, ovary; Ut, uterus.

231  
232  
233  
234  
235  
236  
237  
238  
239  
240  
241  
242  
243

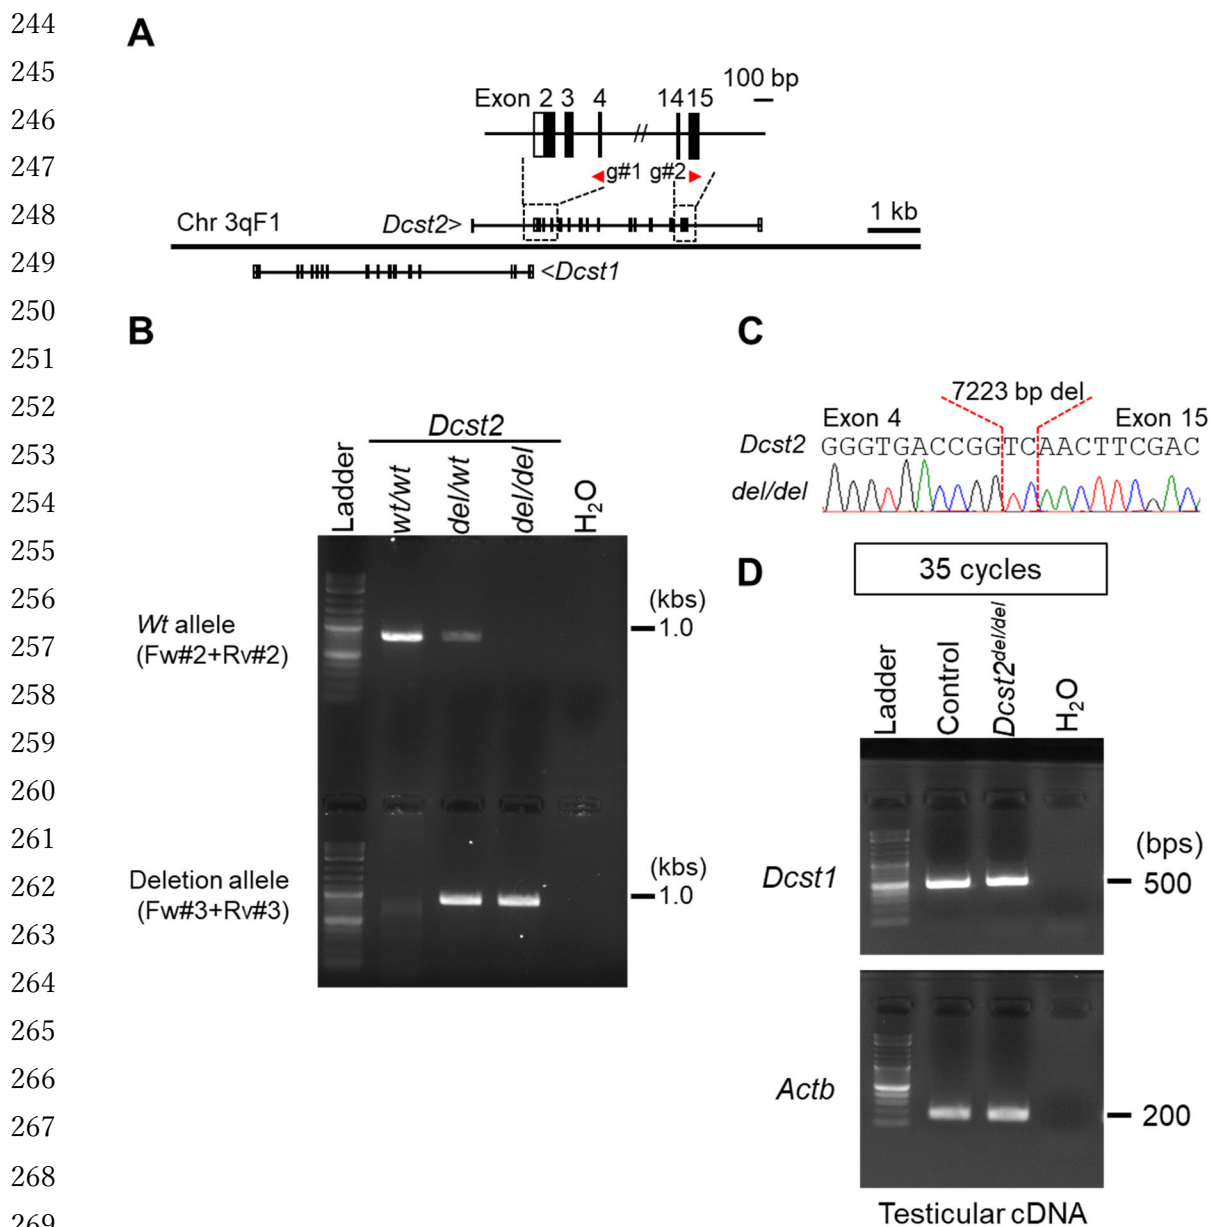

**Figure S3. Generation of *Dcst2*<sup>del/del</sup> mice.**

**A) gRNA design.** Mouse *Dcst1* and *Dcst2* are adjacent genes in a head-to-head arrangement such that parts of their 5' genomic regions overlap. To delete the coding region of *Dcst2*, we designed 2 gRNAs in exon4 and 15 of *Dcst2*. Black colored boxes show the coding region.

**B and C) Genotyping with PCR and direct sequencing.** Four primers were used for the genotyping PCR. The amplicons were subjected to direct sequencing, and the mutant allele has a 7223 bp deletion and 2 bp insertion.

**D) Detection of *Dcst1* mRNA in *Dcst2*<sup>del/del</sup> testis.**



280  
 281  
 282  
 283  
 284  
 285  
 286  
 287  
 288  
 289  
 290  
 291  
 292  
 293  
 294  
 295  
 296  
 297  
 298  
 299  
 300  
 301  
 302  
 303  
 304  
 305  
 306  
 307  
 308  
 309  
 310  
 311  
 312  
 313  
 314  
 315

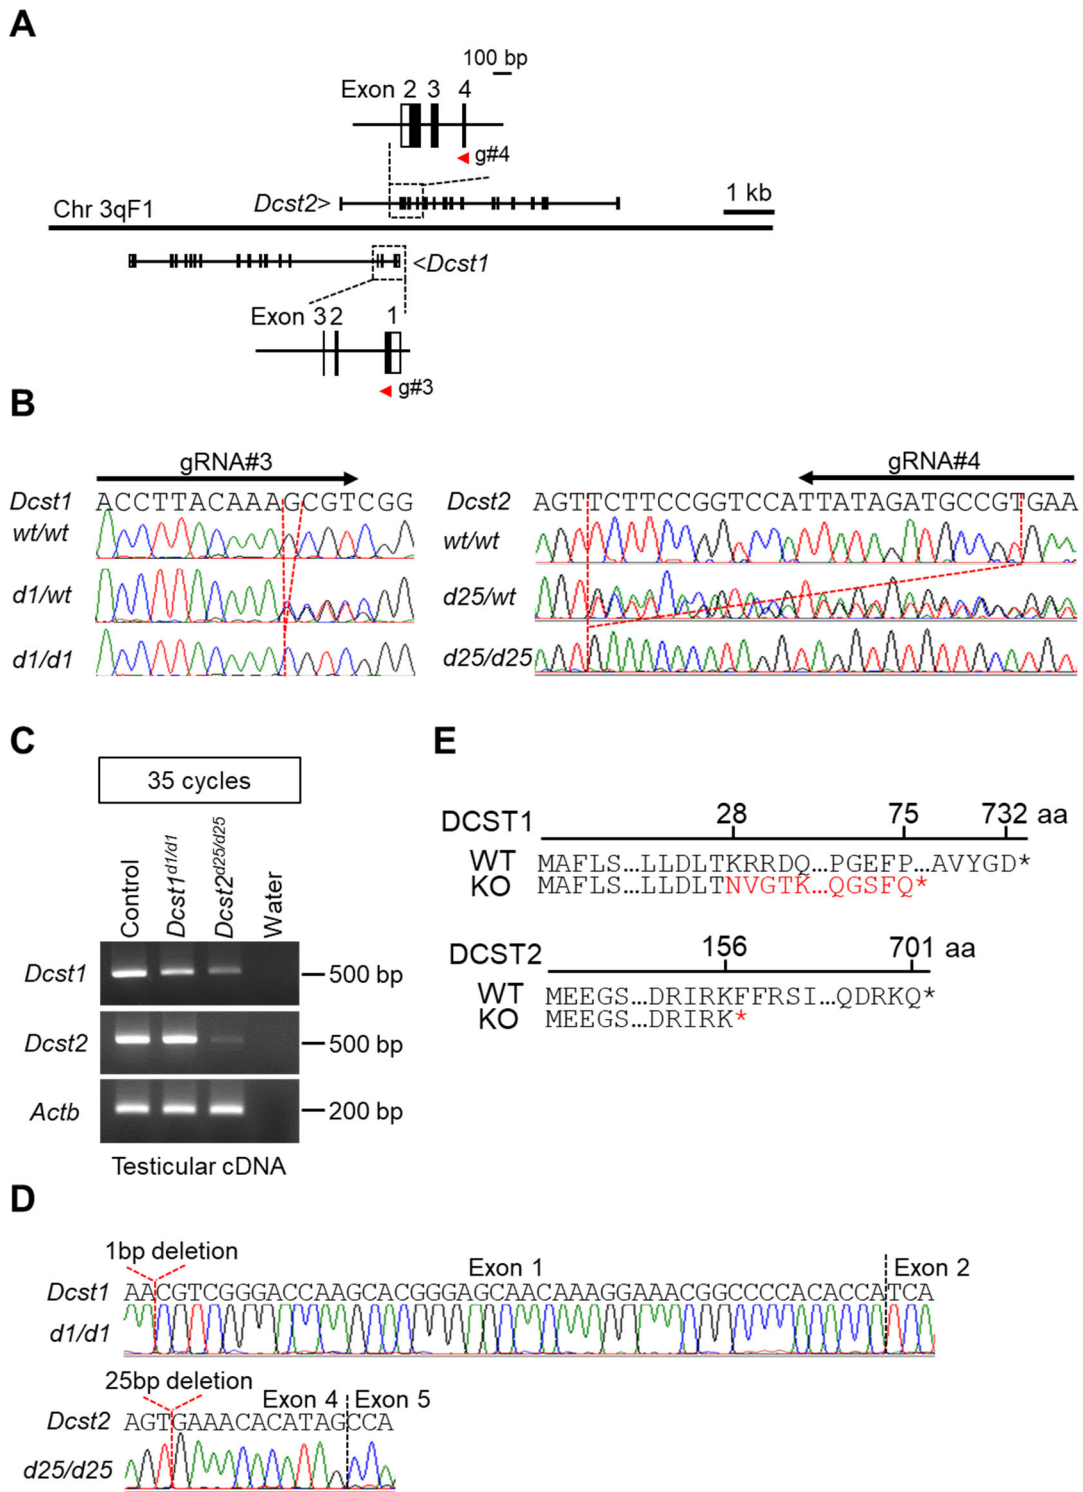

316 **Figure S4. Generation of *Dcst1*<sup>d1/d1</sup> and *Dcst2*<sup>d25/d25</sup> mice.**

317 **A) gRNA design.** To generate indel mutant mice of *Dcst1* and *Dcst2*, we designed 2  
318 gRNAs in exon1 of *Dcst1* and exon 4 of *Dcst2*. Black colored boxes show the coding  
319 region.

320 **B) Genome sequence of *Dcst1* and *Dcst2* in *Dcst1*<sup>d1/d1</sup> and *Dcst2*<sup>d25/d25</sup> mice.** The mutant  
321 alleles of *Dcst1* and *Dcst2* have a 1-bp deletion in *Dcst1* and a 25-bp deletion in *Dcst2*,  
322 respectively.

323 **C and D) Detection and cDNA sequencing of *Dcst1* and *Dcst2* mRNAs in *Dcst1*<sup>d1/d1</sup>  
324 and *Dcst2*<sup>d25/d25</sup> testes.** *Dcst1* mRNA in *Dcst1*<sup>d1/d1</sup> testis and *Dcst2* mRNA in *Dcst2*<sup>d25/d25</sup>  
325 testis were detected (panel C), but *Dcst1* and *Dcst2* cDNA sequencing have a 1-bp and  
326 25-bp deletion in *Dcst1* and *Dcst2*, respectively.

327 **E) Predicted amino acid sequences of *Dcst1/2* KO mice.** The indel mutation causes the  
328 amino acid changes (red-colored letters) due to the frame shift, leading to the appearance  
329 of premature stop codon (\*).

330

331

332

333

334

335

336

337

338

339

340

341

342

343

344

345

346

347

348

349

350

351

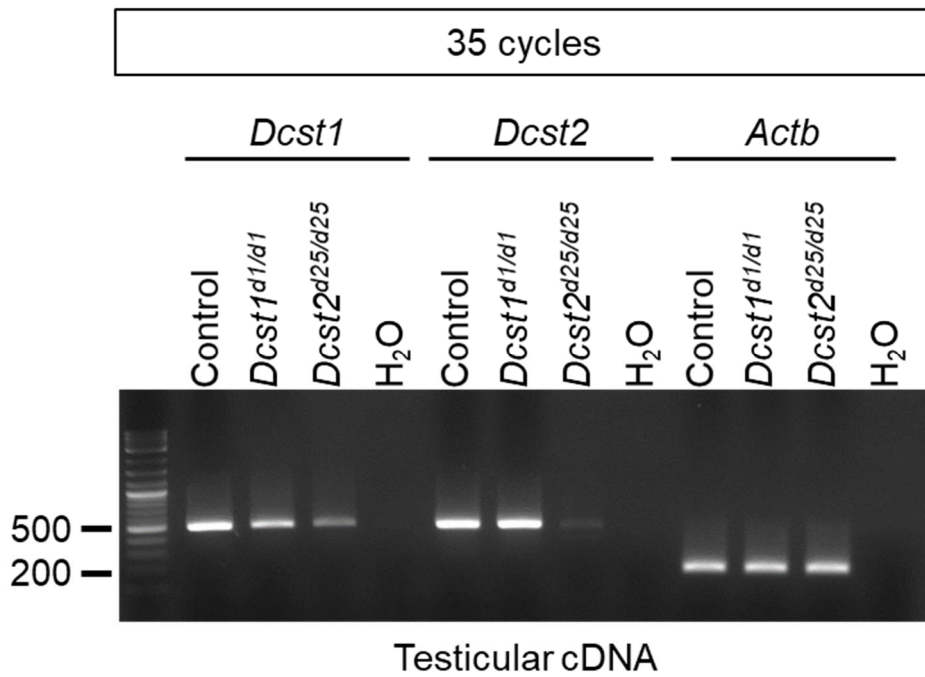

368 **Figure S5. Detection of *Dcst1* and *Dcst2* mRNAs in *Dcst1*<sup>d1/d1</sup> and *Dcst2*<sup>d25/d25</sup> testes.**  
 369 *Dcst1* mRNA in *Dcst1*<sup>d1/d1</sup> testis and *Dcst2* mRNA in *Dcst2*<sup>d25/d25</sup> testis were detected.  
 370 The uncropped and unedited images in Figure S4C were shown.

388  
 389  
 390  
 391  
 392  
 393  
 394  
 395  
 396  
 397  
 398  
 399  
 400  
 401  
 402  
 403  
 404  
 405  
 406  
 407  
 408  
 409  
 410  
 411  
 412  
 413  
 414  
 415  
 416  
 417  
 418  
 419  
 420  
 421  
 422  
 423

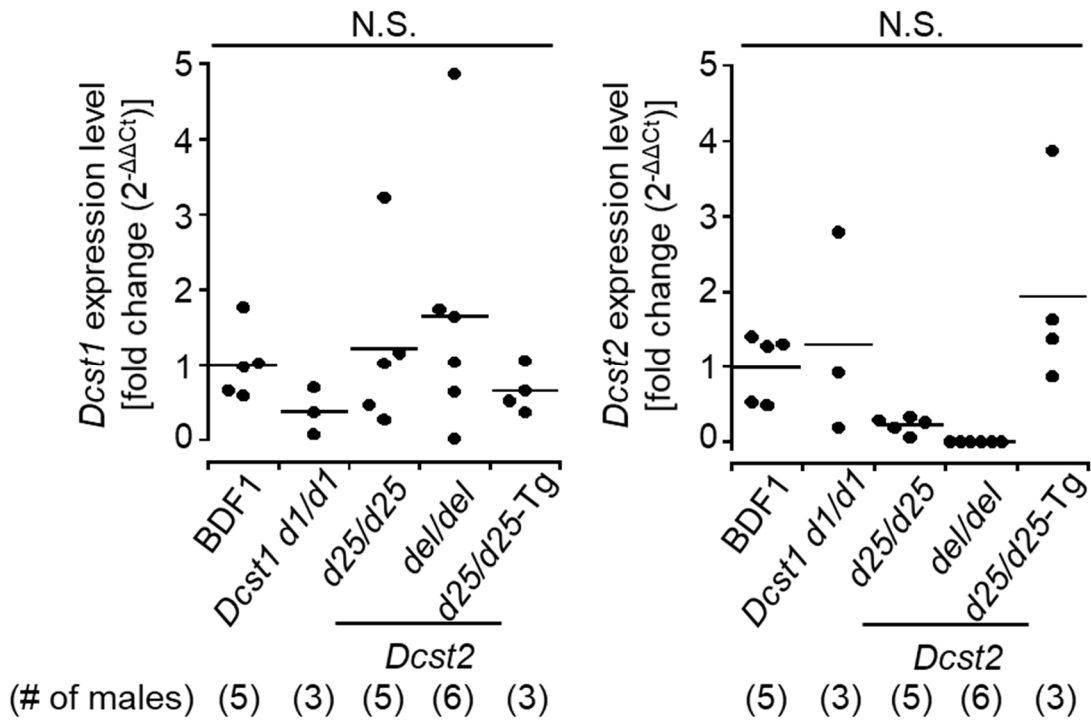

**Figure S6. *Dcst1/2* expression levels in each mutant using quantitative PCR.** *Actb* was used as a reference gene, and the relative difference in the expression level was calculated by the  $\Delta\Delta Ct$  method. N.S.: not significance.

424  
 425  
 426  
 427  
 428  
 429  
 430  
 431  
 432  
 433  
 434  
 435  
 436  
 437  
 438  
 439  
 440  
 441  
 442  
 443  
 444  
 445  
 446  
 447  
 448  
 449  
 450  
 451  
 452  
 453  
 454  
 455  
 456  
 457  
 458  
 459

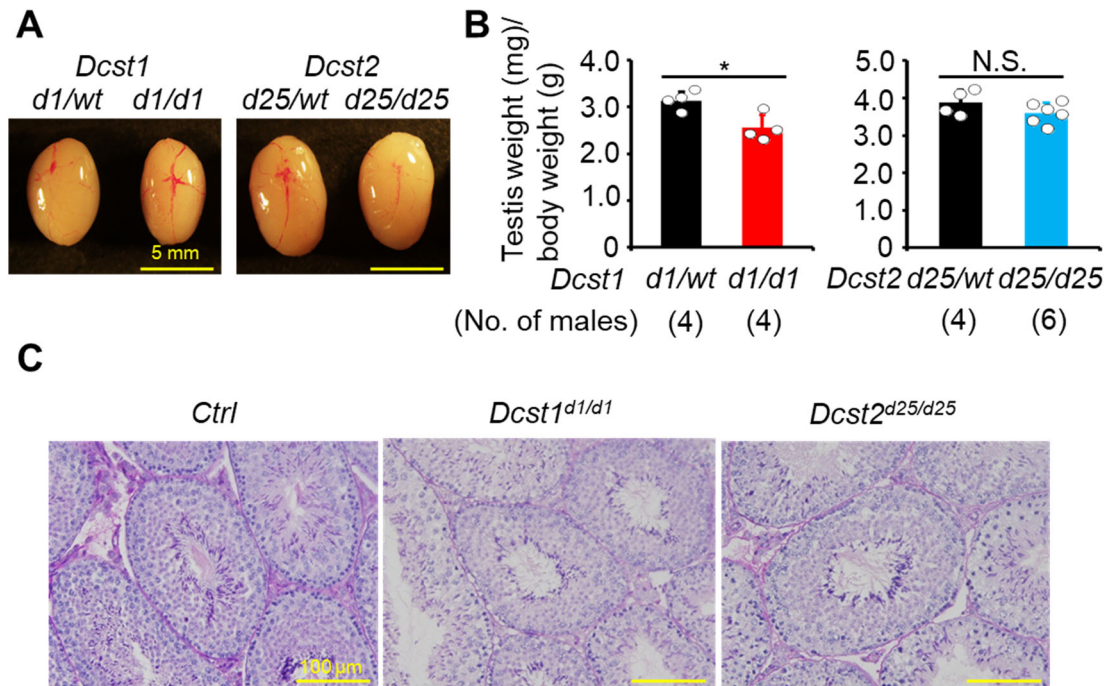

**Figure S7. Analysis of *Dcst1<sup>d1/d1</sup>* and *Dcst2<sup>d25/d25</sup>* testes.**

**A) Testis morphology.**

**B) Testis weight (mg) / body weight (g).** The value of *Dcst1<sup>d1/d1</sup>* testis slightly decreased compared with the *Dcst1<sup>d1/wt</sup>* testis. \*:  $p < 0.05$ ., N.S.: not significant ( $p = 0.24$ ).

**C) Histological analysis.** There is no overt abnormality in *Dcst1<sup>d1/d1</sup>* and *Dcst2<sup>d25/d25</sup>* spermatogenesis. Shown are PAS-hematoxylin-stained sections of testes of wild-type (Ctrl), *Dcst1<sup>d1/d1</sup>* and *Dcst2<sup>d25/d25</sup>* mice.

All values are shown as the mean  $\pm$  SD.

460  
 461  
 462  
 463  
 464  
 465  
 466  
 467  
 468  
 469  
 470  
 471  
 472  
 473  
 474  
 475  
 476  
 477  
 478  
 479  
 480  
 481  
 482  
 483  
 484  
 485  
 486  
 487  
 488  
 489  
 490  
 491  
 492  
 493  
 494  
 495

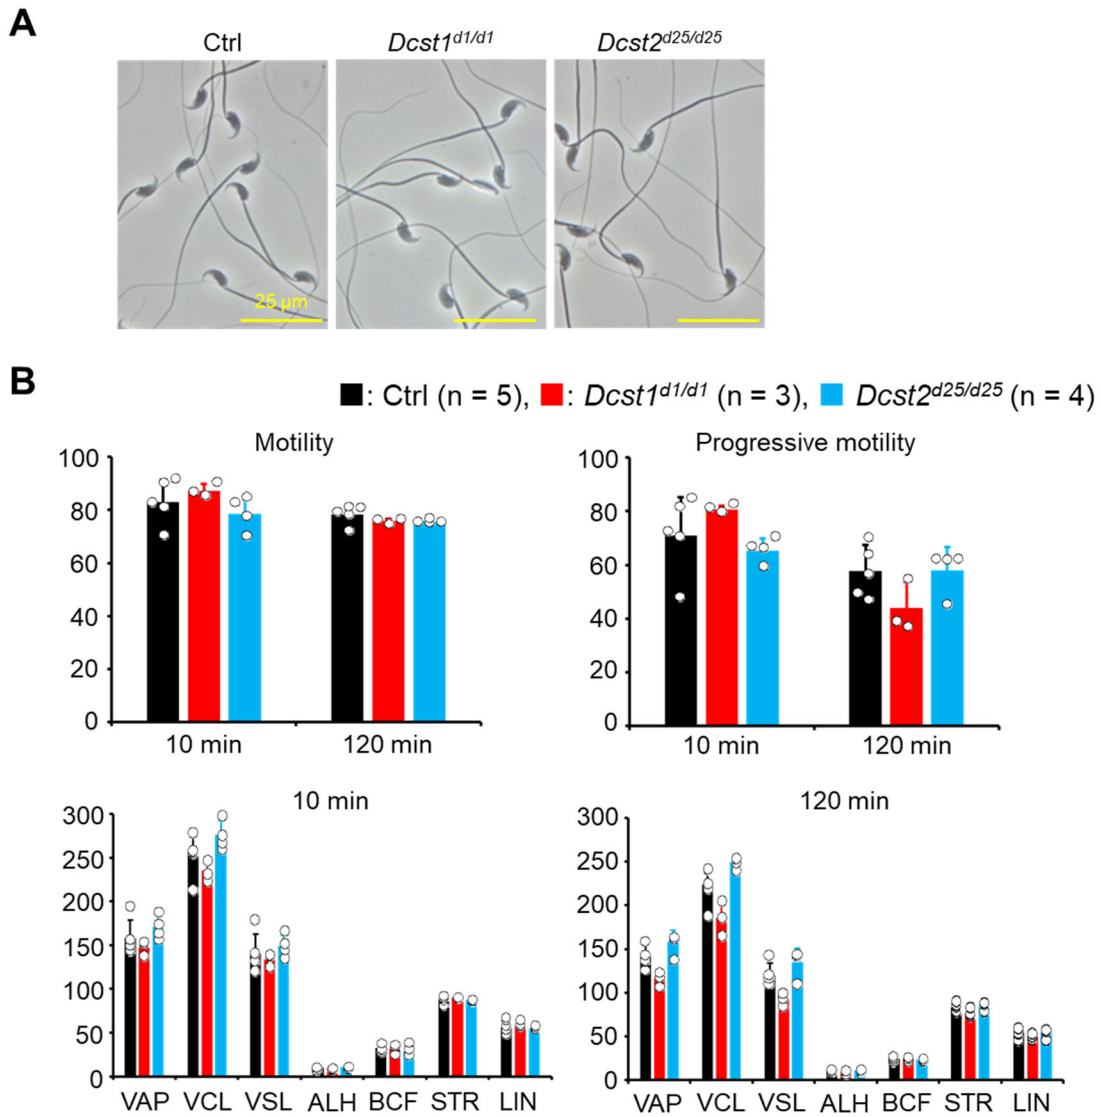

**Figure S8. Analysis of *Dcst1* KO and *Dcst2* KO sperm.**

**A) Sperm morphology.**

**B) Sperm motility.** There was no difference in sperm motility parameters between Ctrl, *Dcst1* KO and *Dcst2* KO sperm. Sperm from *Dcst1<sup>d1/wt</sup>* and *Dcst2<sup>d25/wt</sup>* males were used as the control. VAP: average path velocity, VSL: straight line velocity, VCL: curvilinear velocity, ALH: amplitude of lateral head, BCF: beat cross frequency, STR: straightness of trajectory, LIN: linearity.

All values are shown as the mean  $\pm$  SD.

496  
497  
498  
499  
500  
501  
502  
503  
504  
505  
506  
507  
508  
509  
510  
511  
512  
513  
514  
515  
516  
517  
518  
519  
520  
521  
522  
523  
524  
525  
526  
527  
528  
529  
530  
531

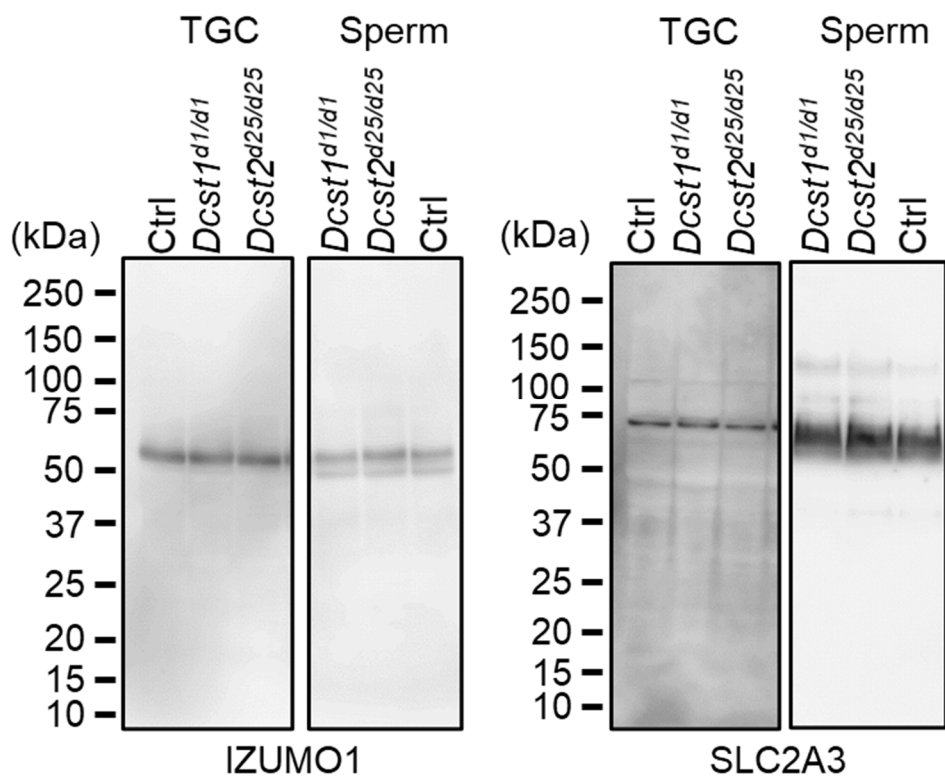

**Figure S9. Detection of IZUMO1.** The band signals of IZUMO1 in TGC and sperm of *Dcst1<sup>d1/d1</sup>* and *Dcst2<sup>d25/d25</sup>* male mice were comparable to the control wild-type sperm. SLC2A3, one of proteins in sperm tail, was used as the loading control. The uncropped and unedited images in Figure 2B were shown.

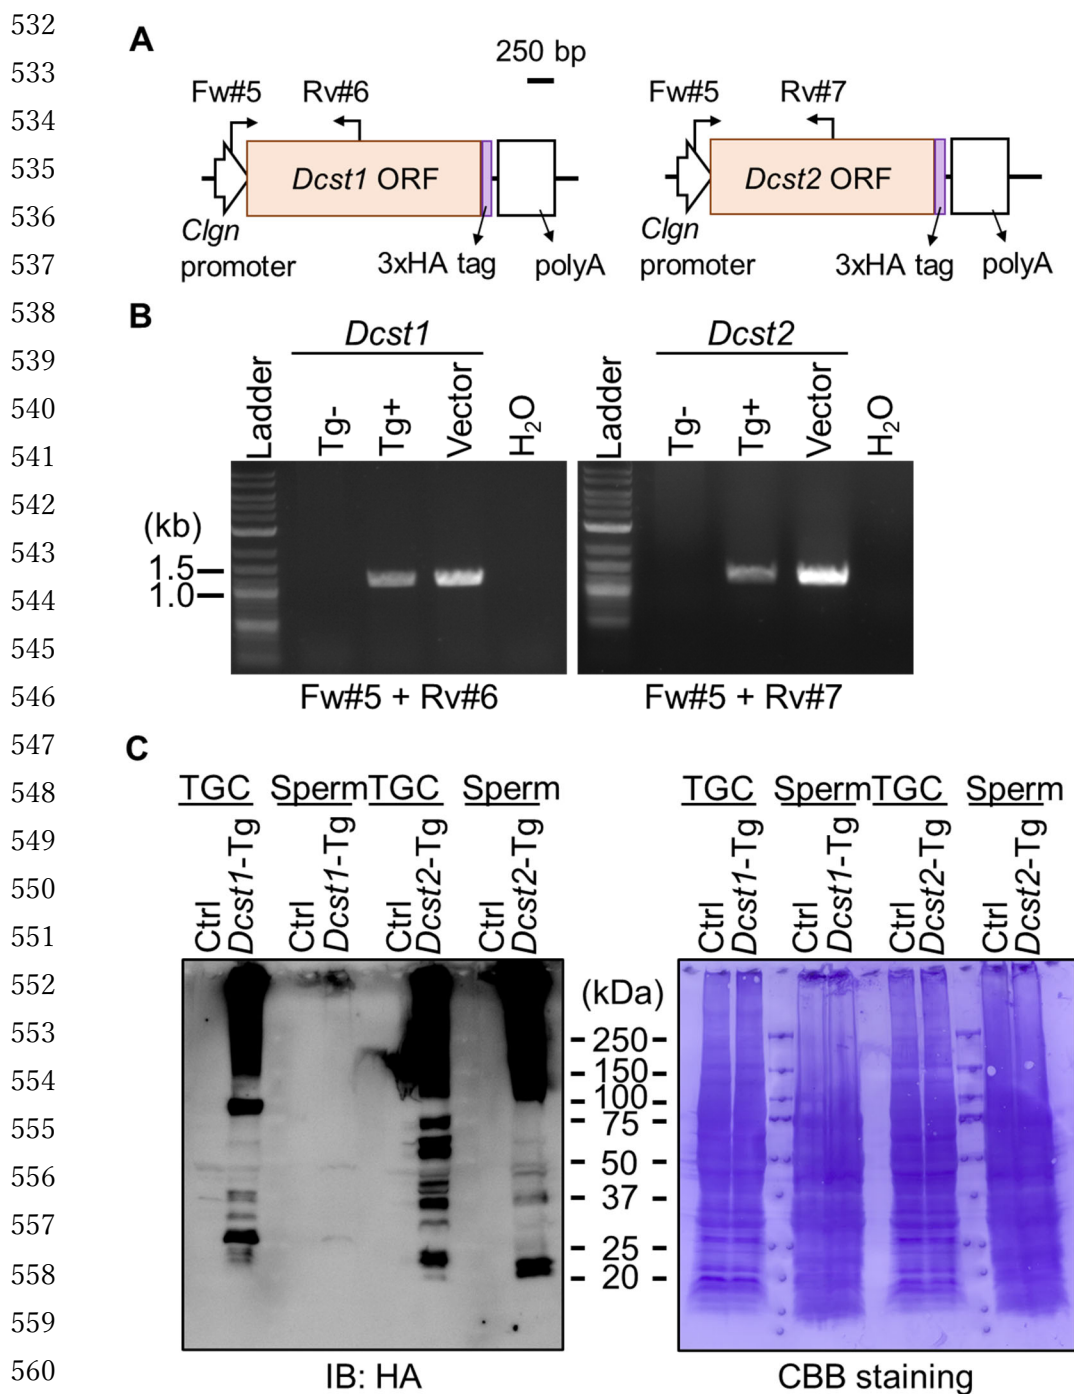

562 **Figure S10. Generation of *Dcst1*-3xHA and *Dcst2*-3xHA Tg mice.**

563 **A) Schematic presentation of generating *Dcst1*-3xHA and *Dcst2*-3xHA Tg mice.** The  
564 transgenes with ORF regions of mouse *Dcst1* and *Dcst2* and 3xHA tag were expressed as  
565 a fused protein under the testis-specific Calmegin (*Clgn*) promoter.

566 **B) Genotyping of *Dcst1*-3xHA and *Dcst2*-3xHA Tg mice.**

567 **C) Detection of HA-tagged DCST1/2.** TGC: testicular germ cells.



568  
569  
570  
571  
572  
573  
574  
575  
576  
577  
578  
579  
580  
581  
582  
583  
584  
585  
586  
587  
588  
589  
590  
591  
592  
593  
594  
595  
596  
597  
598  
599  
600  
601  
602  
603

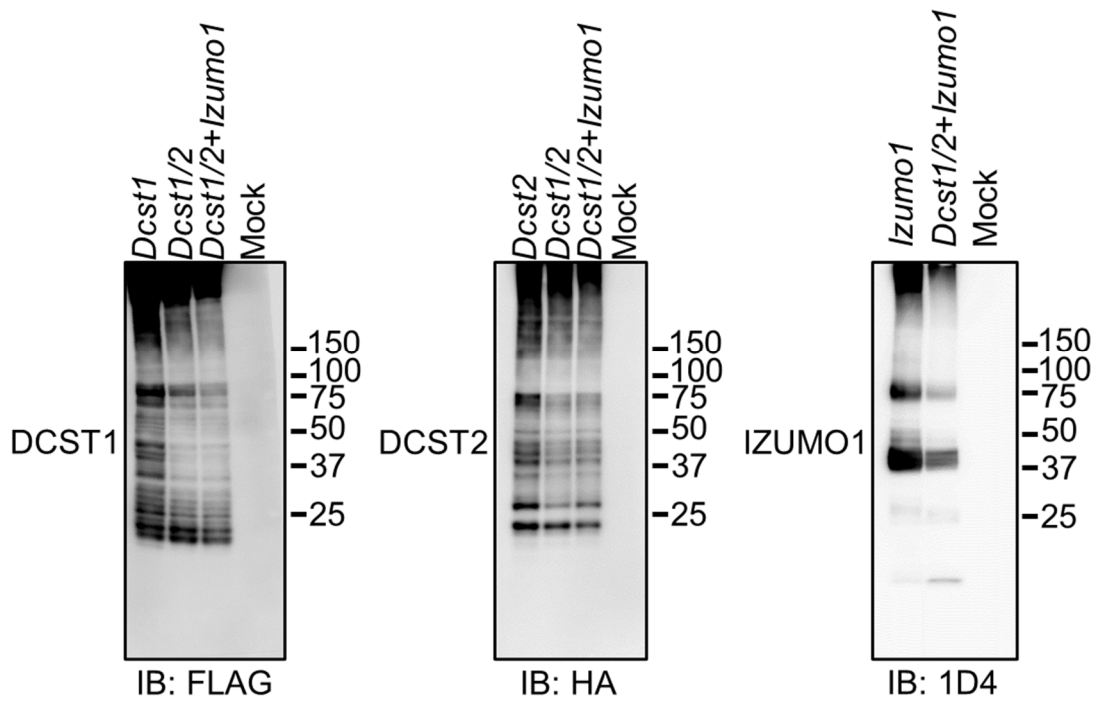

**Figure S11. Detection of DCST1/2 and IZUMO1.** FLAG-tagged DCST1, HA-tagged DCST2, and 1D4-tagged IZUMO1 were detected in HEK293T cells overexpressing *Dcst1*-3xFLAG, *Dcst2*-3xHA, and *Izumo1*-1D4. The uncropped and unedited images in Figure 4A were shown.

604  
605  
606  
607  
608  
609  
610  
611  
612  
613  
614  
615  
616  
617  
618  
619  
620  
621  
622  
623  
624  
625  
626  
627  
628  
629  
630  
631  
632  
633  
634  
635  
636  
637  
638  
639

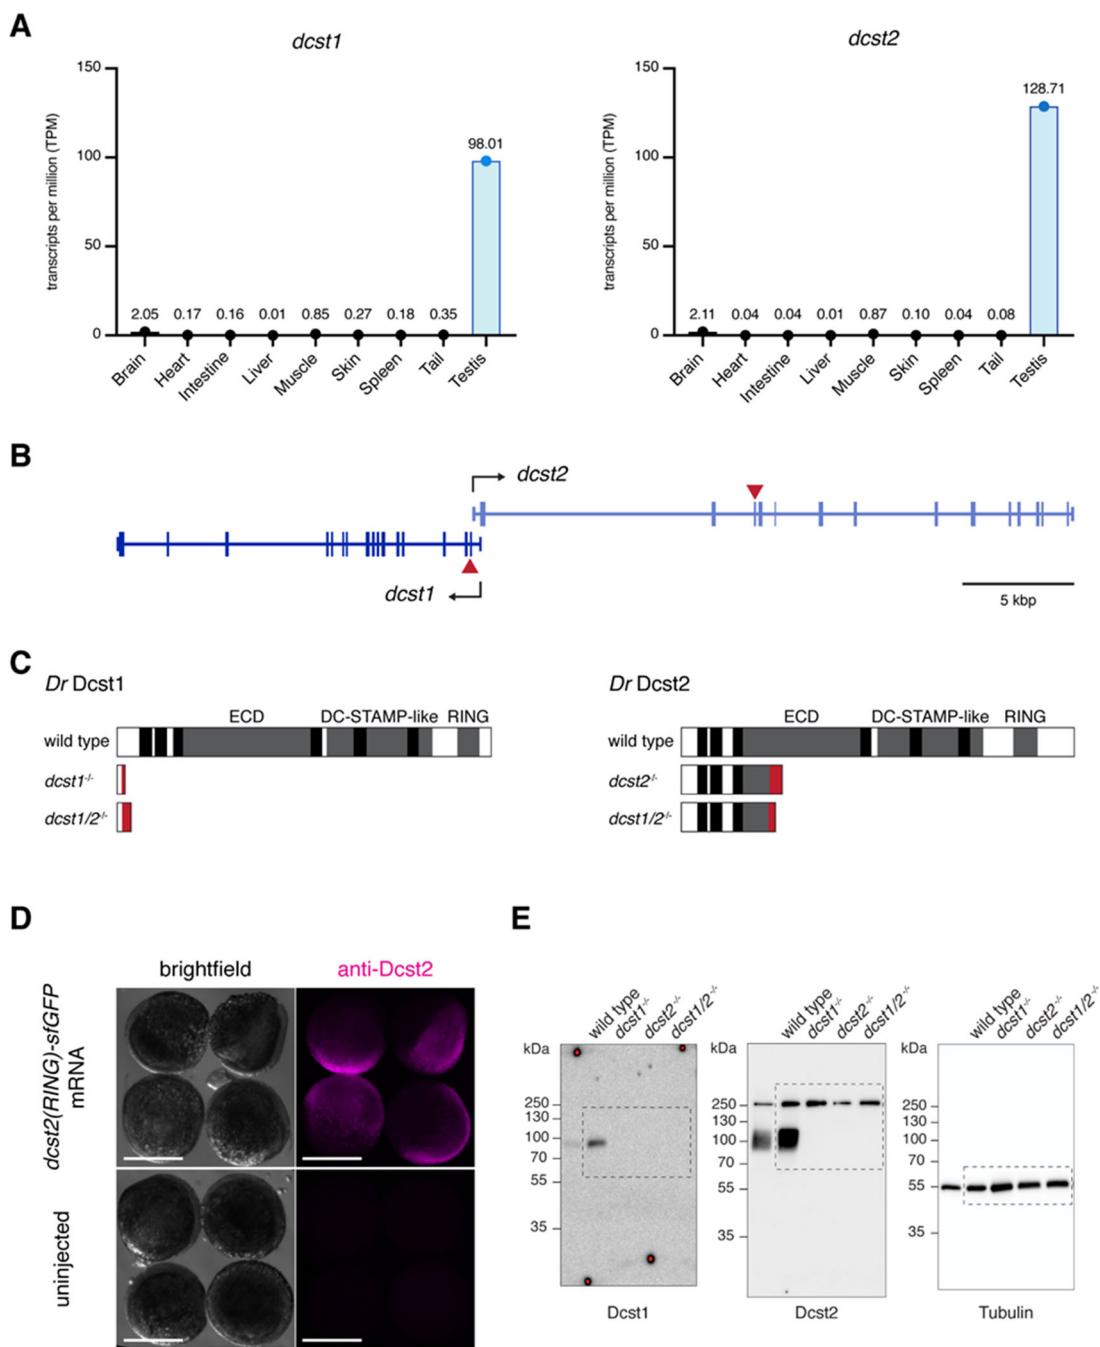

640 **Figure S12: Expression of *dcst1* and *dcst2* in zebrafish.**

641 **A) *Dcst1* and *dcst2* genes are specifically expressed in adult testis in zebrafish.** RNA-  
642 Seq analysis of *dcst1* and *dcst2* gene expression levels in various adult tissues. Amongst  
643 all the tissues tested, *dcst1* and *dcst2* transcripts are strongly enriched in adult testis. The  
644 y-axis shows TPM values (transcripts per million).

645 **B) *Dcst1* and *dcst2* gene locus in zebrafish.** *Dcst1* and *dcst2* genes overlap in their 5'  
646 ends. The red triangles indicate the sites of the introduced mutations in *dcst1* and *dcst2*.

647 **C) *Dcst1* and *Dcst2* domain organization and mutant proteins.** Zebrafish *Dcst1* and  
648 *Dcst2* are multi-pass transmembrane proteins. Predicted transmembrane domains (black,  
649 Phobius prediction<sup>10</sup>), the extracellular domain (ECD), the DC-STAMP-like domain  
650 (DC-STAMP) and C<sub>4</sub>C<sub>4</sub> RING finger domain<sup>20</sup> are indicated. The *dcst1* and *dcst2* mutant  
651 alleles encode for truncated proteins. The aberrant translation caused by frameshift indels  
652 up to the premature termination codon is indicated in red.

653 **D) The anti-*Dcst2* antibody detects overexpressed *Dcst2* protein in zebrafish  
654 embryos by immunofluorescence.** Immunofluorescent detection of *Dcst2* protein  
655 (magenta) in zebrafish embryos. Embryos were either injected at the 1-cell stage with 100  
656 pg of *dcst2* (*RING*)<sup>20</sup>-*sfGFP* mRNA (top; overexpression of *Dcst2* (*RING*)-*sfGFP*) or  
657 not injected (bottom; negative control). Embryos were fixed after 6 hours, followed by  
658 immuno-staining using an antibody recognizing the RING-domain of zebrafish *Dcst2*.  
659 Scale bar: 500 μm.

660 **E) Detection of *Dcst1* and *Dcst2* in zebrafish sperm lysate.** The uncropped and  
661 unedited images of Figure 5C are shown.

662

663

664

665

666

667

668

669

670

671

672

673

674

675

676 **Supplementary Movie Legends**

677

678 **Movie S1. Egg observation after IVF using *Dcst1* KO sperm.**

679 **Movie S2. Egg observation after IVF using *Dcst2* KO sperm.**

680 **Movie S3. Wild-type sperm approach to micropyle.** Wild-type sperm stained with  
681 Mitotracker Deep-Red was added to wild-type eggs and images were acquired following  
682 sperm addition.

683 **Movie S4. *Dcst2* mutant sperm approach to micropyle.** *Dcst2* mutant sperm stained  
684 with Mitotracker Deep-Red was added to wild-type eggs and images were acquired  
685 following sperm addition.

686 **Movie S5. *Dcst2* mutant sperm are unable to stably bind to wild-type eggs.** Time lapse  
687 of sperm binding assay with wild-type (left) and *dcst2*<sup>-/-</sup> (right) sperm stained with  
688 Mitotracker Deep Red and wild-type eggs. After 2 minutes following sperm addition,  
689 wild-type sperm are stably bound to the oolemma while *dcst2*<sup>-/-</sup> mutant sperm are unable  
690 to bind.

| <b>Supplemental Table S1. Primer sequences for the tissue expression analysis</b> |                    |                           |                        |                            |
|-----------------------------------------------------------------------------------|--------------------|---------------------------|------------------------|----------------------------|
| <b>Genes</b>                                                                      | <b>Accession #</b> | <b>Forward (5'-3')</b>    | <b>Reverse (5'-3')</b> | <b>Predicted size (bp)</b> |
| <i>Dcst1</i>                                                                      | ENSMUSG00000042672 | ATGGCGTTCCTCTCATCAAC      | TTGGACCTTAGATTGGCCGC   | 500                        |
| <i>Dcst2</i>                                                                      | ENSMUST00000208216 | GGGCCTTGTGCGAACACCCT      | ACGGGAGTGCGGATGACCGT   | 491                        |
| <i>Actb</i>                                                                       | ENSMUSG00000029580 | CATCCGTAAAGACCTCTATGCCAAC | ATGGAGCCACCGATCCACA    | 171                        |

| <b>Supplemental Table S2. Primer sequences for the genotyping and gRNA sequences.</b> |                    |                                   |                                                       |                                                     |                     |                                        |
|---------------------------------------------------------------------------------------|--------------------|-----------------------------------|-------------------------------------------------------|-----------------------------------------------------|---------------------|----------------------------------------|
| <b>Genes</b>                                                                          | <b>Accession #</b> | <b>gRNAs (5'-3')</b>              | <b>Forward (5'-3')</b>                                | <b>Reverse (5'-3')</b>                              | <b>Total cycles</b> | <b>Predicted size wild/mutant (bp)</b> |
| <i>Dcst1</i>                                                                          | ENSMUSG00000042672 | TGCTGGACCTTACAAAGCGT<br>(gRNA #3) | CAGCGTTGACTATGGCTGCTGGG<br>(Fw #1)                    | GCCATCTCTCCAGCCCCAGG<br>(Rv #1)                     | 35                  | 617/616                                |
| <i>Dcst2</i>                                                                          | ENSMUSG00000109293 | ACCGGAAGAAGTTCGCTATC<br>(gRNA #1) | AACCAGAGCGTAGGTCGTGG<br>(for wild allele, Fw #2)      | GAGATATACGGGGTTGAGGG<br>(for wild allele, Rv #2)    | 40                  | 822/N.D.                               |
|                                                                                       |                    | TCGAAGAAAGGCCCCGAGC<br>(gRNA #2)  | CACCTCAGCCTAACCATTTGG<br>(for deletion allele, Fw #3) | TGTGCCTAACAAACCCAGG<br>(for deletion allele, Rv #3) | 40                  | 8106/885                               |
|                                                                                       |                    | GTGTTTCACGGCATCTATAA<br>(gRNA #4) | TAAAGCTATTGCCCAGAAGG<br>(for indel, Fw #4)            | ACTTAGGATAATAAGATTGG<br>(for indel, Rv #4)          | 40                  | 147/122                                |
| N.D.: not detected.                                                                   |                    |                                   |                                                       |                                                     |                     |                                        |

| <b>Supplemental Table S3. Primer sequences for the genotyping of Tg mice.</b> |                                  |                                            |                     |                            |
|-------------------------------------------------------------------------------|----------------------------------|--------------------------------------------|---------------------|----------------------------|
| <b>Genes</b>                                                                  | <b>Forward (5'-3')</b>           | <b>Reverse (5'-3')</b>                     | <b>Total cycles</b> | <b>Predicted size (bp)</b> |
| <i>Dcst1</i>                                                                  | TTGAGCGGGCCGCTTGC GCACTGG (Fw#5) | ATTGGCACACAGATCATGTTGTTGAAGAGTGGGAG (Rv#6) | 35                  | 1202                       |
| <i>Dcst2</i>                                                                  | TTGAGCGGGCCGCTTGC GCACTGG (Fw#5) | ACATTGTCGAATTTGTCGGAGTTCAGATAATAGTA (Rv#7) | 35                  | 1301                       |

| <b>Supplemental Table S4. Primer sequences for qPCR analysis</b> |                    |                           |                        |                            |
|------------------------------------------------------------------|--------------------|---------------------------|------------------------|----------------------------|
| <b>Genes</b>                                                     | <b>Accession #</b> | <b>Forward (5'-3')</b>    | <b>Reverse (5'-3')</b> | <b>Predicted size (bp)</b> |
| <i>Dcst1</i>                                                     | ENSMUSG00000042672 | GGCAGTGTTCAAGGGCATGG      | GGTCCGAACATCTCTGTGC    | 163                        |
| <i>Dcst2</i>                                                     | ENSMUST00000208216 | AAGGTCGTTTCGGGATTCCC      | TGCCAAGCAGTTTCATCAG    | 163                        |
| <i>Actb</i>                                                      | ENSMUSG00000029580 | CATCCGTAAAGACCTCTATGCCAAC | ATGGAGCCACCGATCCACA    | 171                        |

| Supplemental Table S5. Primers for zebrafish |                                                                                           |                                                                                                                                         |
|----------------------------------------------|-------------------------------------------------------------------------------------------|-----------------------------------------------------------------------------------------------------------------------------------------|
| Oligo                                        | Sequence                                                                                  | Comment                                                                                                                                 |
| <i>dcst1</i> _sgRNA_exon2                    | TAATACGACTCACTATAgggtaaacgcacttgaa<br>tggGTTTTAGAGCTAGAAATAGCAAG                          | T7 5' sequence, target sequence, 3' TRACER OLIGO ANNEALING SEQUENCE                                                                     |
| <i>dcst1</i> _sgRNA_exon3                    | TAATACGACTCACTATAggcacagaaaactctg<br>acagGTTTTAGAGCTAGAAATAGCAAG                          | T7 5' sequence, target sequence, 3' TRACER OLIGO ANNEALING SEQUENCE                                                                     |
| <i>dcst2</i> _sgRNA_exon4a                   | TAATACGACTCACTATAggataagatcaaggaa<br>atggcgGTTTTAGAGCTAGAAATAGCAAG                        | T7 5' sequence, target sequence, 3' TRACER OLIGO ANNEALING SEQUENCE                                                                     |
| <i>dcst2</i> _sgRNA_exon4b                   | TAATACGACTCACTATAggcgaggaatgcttac<br>tcgaGTTTTAGAGCTAGAAATAGCAAG                          | T7 5' sequence, target sequence, 3' TRACER OLIGO ANNEALING SEQUENCE                                                                     |
| Tracer_oligo                                 | AAAAGCACCGACTCGGTGCCACTTTTTTC<br>AAGTTGATAACGGACTAGCCTTATTTTA<br>ACTTGCTATTTCTAGCTCTAAAAC | Common oligo used to generate guide RNAs for zebrafish mutagenesis by annealing and <i>in vitro</i> transcription using T7 <sup>4</sup> |
| <i>dcst1</i> _exon2_F                        | GTTTTCTTTAGCGGTGTAGC                                                                      | Primers for genotyping zebrafish <i>dcst1</i> mutants, yield 311-bp wild-type product                                                   |
| <i>dcst1</i> _exon2_R                        | ACAACCTGGTTTTGCAGTTAC                                                                     |                                                                                                                                         |
| <i>dcst2</i> _exon4_F                        | GTCAGCCATAATGTTGTGTG                                                                      | Primers for genotyping zebrafish <i>dcst2</i> mutants, yield 394-bp wild-type product                                                   |
| <i>dcst2</i> _exon4_R                        | ACGTTTCTTAGAGTACGAGC                                                                      |                                                                                                                                         |
| <i>dcst1</i> _amp_F                          | CAGCAATGGAACTAGACG                                                                        | Primers used to amplify <i>dcst1</i> cDNA from <i>dcst1</i> <sup>-/-</sup> zebrafish testis                                             |
| <i>dcst1</i> _amp_R                          | GGAGGTAAAGTTTATCAGCAGCC                                                                   |                                                                                                                                         |
| <i>dcst2</i> _amp_F                          | ATGACTCCACAGGAACCTG                                                                       | Primers used to amplify <i>dcst2</i> cDNA from <i>dcst2</i> <sup>-/-</sup> zebrafish testis                                             |
| <i>dcst2</i> _amp_R                          | GCCTTAGATTATGTTAATAGCCTCCG                                                                |                                                                                                                                         |
| <i>dcst1</i> _seq_R                          | ATTATGCTGGATGTTGCAA                                                                       | Primer used to sequence <i>dcst1</i> <sup>-/-</sup> cDNA                                                                                |
| <i>dcst2</i> _seq_F                          | CTTCATCTGTACCTTGGTGATC                                                                    | Primers used to sequence <i>dcst2</i> cDNA                                                                                              |
| <i>dcst2</i> _seq_R                          | ACGTTTCTTAGAGTACGAGC                                                                      |                                                                                                                                         |
| <i>dcst2</i> -RING_F                         | gtacttgttcttttgcaggatccgccaccatgAACAAAGGT<br>AGACCAGCAAC                                  | to clone the CDS of <i>Dcst2</i> (566-709) into BamHI/EcoRI <i>pMTB-actb2:MCS-sfGFP</i>                                                 |
| <i>dcst2</i> -RING_R                         | ACACTCCTGATCCTCCTGAgaattcgattatgta<br>atagcctccgtattc                                     |                                                                                                                                         |

## References

- 1 Eddy, S. R. Profile hidden Markov models. *Bioinformatics* **14**, 755-763 (1998).
- 2 El-Gebali, S. *et al.* The Pfam protein families database in 2019. *Nucleic Acids Res* **47**, D427-D432 (2019).
- 3 Katoh, K. & Toh, H. Recent developments in the MAFFT multiple sequence alignment program. *Brief Bioinform* **9**, 286-298 (2008).
- 4 Waterhouse, A. M., Procter, J. B., Martin, D. M., Clamp, M. & Barton, G. J. Jalview Version 2--a multiple sequence alignment editor and analysis workbench. *Bioinformatics* **25**, 1189-1191 (2009).
- 5 Minh, B. Q. *et al.* IQ-TREE 2: New Models and Efficient Methods for Phylogenetic Inference in the Genomic Era. *Mol Biol Evol* **37**, 1530-1534 (2020).
- 6 Kalyaanamoorthy, S., Minh, B. Q., Wong, T. K. F., von Haeseler, A. & Jermini, L. S. ModelFinder: fast model selection for accurate phylogenetic estimates. *Nat Methods* **14**, 587-589 (2017).
- 7 Hoang, D. T., Chernomor, O., von Haeseler, A., Minh, B. Q. & Vinh, L. S. UFBoot2: Improving the Ultrafast Bootstrap Approximation. *Mol Biol Evol* **35**, 518-522 (2018).
- 8 Letunic, I. & Bork, P. Interactive Tree Of Life (iTOL): an online tool for phylogenetic tree display and annotation. *Bioinformatics* **23**, 127-128 (2007).
- 9 Krogh, A., Larsson, B., von Heijne, G. & Sonnhammer, E. L. Predicting transmembrane protein topology with a hidden Markov model: application to complete genomes. *J Mol Biol* **305**, 567-580 (2001).
- 10 Kall, L., Krogh, A. & Sonnhammer, E. L. Advantages of combined transmembrane topology and signal peptide prediction--the Phobius web server. *Nucleic Acids Res* **35**, W429-432 (2007).
- 11 Noda, T. *et al.* Sperm proteins SOF1, TMEM95, and SPACA6 are required for sperm-oocyte fusion in mice. *Proc Natl Acad Sci U S A* **117**, 11493-11502 (2020).
- 12 Noda, T., Oji, A. & Ikawa, M. Genome Editing in Mouse Zygotes and Embryonic Stem Cells by Introducing SgRNA/Cas9 Expressing Plasmids. *Methods Mol Biol* **1630**, 67-80 (2017).
- 13 Noda, T. *et al.* Nine genes abundantly expressed in the epididymis are not essential for male fecundity in mice. *Andrology* **7**, 644-653 (2019).
- 14 Gagnon, J. A. *et al.* Efficient mutagenesis by Cas9 protein-mediated oligonucleotide insertion and large-scale assessment of single-guide RNAs. *PLoS One* **9**, e98186 (2014).
- 15 Gibson, D. G. *et al.* Enzymatic assembly of DNA molecules up to several hundred



- kilobases. *Nat Methods* **6**, 343-345 (2009).
- 16 Kim, D., Paggi, J. M., Park, C., Bennett, C. & Salzberg, S. L. Graph-based genome alignment and genotyping with HISAT2 and HISAT-genotype. *Nat Biotechnol* **37**, 907-915 (2019).
- 17 Bray, N. L., Pimentel, H., Melsted, P. & Pachter, L. Near-optimal probabilistic RNA-seq quantification. *Nat Biotechnol* **34**, 525-527 (2016).
- 18 Herberg, S., Gert, K. R., Schleiffer, A. & Pauli, A. The Ly6/uPAR protein Bouncer is necessary and sufficient for species-specific fertilization. *Science* **361**, 1029-1033 (2018).
- 19 Cabrera-Quio, L. E., Schleiffer, A., Mechtler, K. & Pauli, A. Zebrafish Ski7 tunes RNA levels during the oocyte-to-embryo transition. *PLoS Genet* **17**, e1009390 (2021).
- 20 Wilson, L. D. *et al.* Fertilization in *C. elegans* requires an intact C-terminal RING finger in sperm protein SPE-42. *BMC Dev Biol* **11**, 10 (2011).
