# Supplementary material for: Sperm membrane proteins DCST1 and DCST2 are required for sperm-egg interaction in mice and fish
Source: PubMed Central journal article supplement (PMC8989947; doi:10.1038/s42003-022-03289-w), 2022-04-07
Supplement: 42003_2022_3289_MOESM3_ESM.pdf [file 42003_2022_3289_MOESM3_ESM.pdf]

## Description of Additional Supplementary Files

**File name: Movie S1.**

**Description:** Egg observation after IVF using Dcst1 KO sperm.

**File name: Movie S2.**

**Description:** Egg observation after IVF using Dcst2 KO sperm.

**File name: Movie S3.**

**Description:** Wild-type sperm approach to micropyle. Wild-type sperm stained with Mitotracker Deep-Red was added to wild-type eggs and images were acquired following sperm addition.

**File name: Movie S4.**

**Description:** Dcst2 mutant sperm approach to micropyle. Dcst2 mutant sperm stained with Mitotracker Deep-Red was added to wild-type eggs and images were acquired following sperm addition.

**File name: Movie S5.**

**Description:** Dcst2 mutant sperm are unable to stably bind to wild-type eggs. Time lapse of sperm binding assay with wild-type (left) and *dcst2*<sup>-/-</sup> (right) sperm stained with Mitotracker Deep Red and wild-type eggs. After 2 minutes following sperm addition, wild-type sperm are stably bound to the oolemma while *dcst2*<sup>-/-</sup> mutant sperm are unable to bind.

**File name:** Supplementary Data 1-10

**Description:**

**Supplementary Data 1. Median-normalized level of *Dcst1* and *Dcst2* mRNA expression during mouse spermatogenesis.** Each value of the median-normalized level in Figure 1B was shown. Ud Sg, undifferentiated spermatogonia; A1-A2 Sg, A1-A2 differentiating spermatogonia; A3-B Sg, A3-A4-In-B differentiating spermatogonia; Prele Sc, preleptotene spermatocytes; Le/Zy Sc, leptotene/zygotene spermatocytes; Pa Sc, pachytene spermatocytes; Di/Se Sc, diplotene/secondary spermatocytes; Early St, early round spermatids; Mid St, mid round spermatids; Late St, late round spermatids; SC, Sertoli cells.

**Supplementary Data 2. Male fecundity.** The pups/plug for each mating pair in Figure 1C was shown.

**Supplementary Data 3. Sperm fertilizing ability using cumulus-intact eggs *in vitro*.** The fertilization rates in Figure 1E were shown.

**Supplementary Data 4. Sperm fertilizing ability using ZP-free eggs *in vitro*.** The fertilization rates in Figure 1F were shown.

**Supplementary Data 5. Fusion ability.** The number of fused sperm and total number of observed eggs (see Figure 2F) were shown.

**Supplementary Data 6. Rescue of male fertility.** The pups/plug of *Dcst1*<sup>d1/d1</sup> males with *Dcst1*-3xHA Tg insertion and *Dcst2*<sup>d25/d25</sup> males with *Dcst2*-3xHA Tg insertion was shown (see Figure 3A).

**Supplementary Data 7. The number of HEK293T cells bound to eggs.** The adhesion ability of HEK293T cells overexpressing *Dcst1/2* and *Izumo1* to oocyte membrane was examined (see Figure 4C).

**Supplementary Data 8. Fertilization rates of *dcst1*<sup>-/-</sup>, *dcst2*<sup>-/-</sup>, double mutant as well as wild-type zebrafish.** The fertilization rates are provided per clutch of embryos; each clutch is derived from individual matings (see Figure 5A).

**Supplementary Data 9. Quantification of zebrafish Dcst2 protein levels relative to Tubulin protein levels by Western Blotting.** The Dcst2 band intensity was normalized to Tubulin band intensity and divided by the normalized wild-type Dcst2 band intensity (see Figure 5C).

**Supplementary Data 10. Quantification of zebrafish wild-type or *dcst2*<sup>-/-</sup> sperm to wild-type activated eggs.** Binding of sperm was assessed by counting the number of stably bound sperm in a 1-minute time window (see Figure 5F).
